# Supplementary material for: Inhibitors of the Influenza A Virus M2 Proton Channel Discovered Using a High-Throughput Yeast Growth Restoration Assay
Source: PubMed Central journal article supplement (PMC3562233; doi:10.1371/journal.pone.0055271), 2013-02-01
Supplement: pone.0055271.s002.pdf [file pone.0055271.s002.pdf]

Table S1. Activity of hexamethylene amiloride and triazine analogs in the TEVC assay

| Compound name ( <b>ID</b> )                                                         | Structure                                                                            | % inhibition at 100 $\mu$ M in TEVC |                |                |
|-------------------------------------------------------------------------------------|--------------------------------------------------------------------------------------|-------------------------------------|----------------|----------------|
|                                                                                     |                                                                                      | WT                                  | S31N           | V27A           |
| N-(4-nitrobenzyl)adamantan-1-amine ( <b>4</b> )                                     | 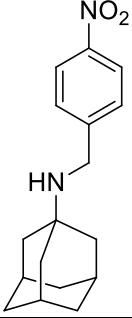    | 43.5 $\pm$ 0.5                      | 15.9 $\pm$ 0.2 | 9.7 $\pm$ 0.3  |
| Hexamethylene amiloride ( <b>14</b> )                                               |    | 89.9 $\pm$ 0.7                      | 17.6 $\pm$ 0.8 | 11.3 $\pm$ 1.2 |
| 5-( <i>N,N</i> -Dimethyl)amiloride hydrochloride ( <b>20</b> )                      |    | 23.3 $\pm$ 1.9                      | 0              | 0              |
| 5-( <i>N</i> -Ethyl- <i>N</i> -isopropyl)amiloride ( <b>21</b> )                    |  | 47.3 $\pm$ 0.5                      | 5.8 $\pm$ 0.6  | 0              |
| 5-( <i>N</i> -Methyl- <i>N</i> -isobutyl)-amiloride ( <b>22</b> )                   |  | 55.7 $\pm$ 1.0                      | 1.1 $\pm$ 1.1  | 2.1 $\pm$ 2.1  |
| 3-benzyl-6-(methylthio)-1,2,3,4-tetrahydro-1,3,5-triazine hydroiodide ( <b>18</b> ) |   | 4.5 $\pm$ 2.3                       | 3.4 $\pm$ 1.7  | 0              |

|                                                                                             |                                                                                     |            |           |            |
|---------------------------------------------------------------------------------------------|-------------------------------------------------------------------------------------|------------|-----------|------------|
| 6-(methylthio)-3-(thiophen-2-ylmethyl)-1,2,3,4-tetrahydro-1,3,5-triazin-1-ium chloride (23) | 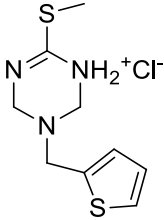   | 8.1 ± 1.7  | 1.6 ± 1.6 | 2.9 ± 1.3  |
| 6-(ethylthio)-3-(furan-2-ylmethyl)-1,2,3,4-tetrahydro-1,3,5-triazin-1-ium chloride (24)     |    | 17.9 ± 2.8 | 1.9 ± 1.6 | 3.1 ± 2.6  |
| 3-(tert-butyl)-6-(methylthio)-1,2,3,4-tetrahydro-1,3,5-triazine hydrobromide (25)           |    | 13.3 ± 1.5 | 7.4 ± 1.2 | 0          |
| 3-(4-(methylthio)-5,6-dihydro-1,3,5-triazin-1(2H)-yl)propan-1-ol hydrobromide (26)          |   | 5.5 ± 0.9  | 4.2 ± 1.0 | 11.9 ± 1.0 |
| 3-(2-methylbut-3-yn-2-yl)-6-(methylthio)-1,2,3,4-tetrahydro-1,3,5-triazine hydroiodide (27) |  | 17.0 ± 1.9 | 4.1 ± 0.2 | 1.8 ± 1.8  |
| 3-benzyl-6-(ethylthio)-1,2,3,4-tetrahydro-1,3,5-triazin-1-ium chloride (28)                 |  | 5.4 ± 1.6  | 4.4 ± 0.7 | 1.1 0.8    |
| 6-(ethylthio)-3-(thiophen-2-ylmethyl)-1,2,3,4-tetrahydro-1,3,5-triazin-1-ium chloride (29)  |  | 6.7 ± 1.4  | 6.1 ± 1.2 | 5.1 ± 0    |

|                                                                                                                 |                                                                                     |                   |                  |                  |
|-----------------------------------------------------------------------------------------------------------------|-------------------------------------------------------------------------------------|-------------------|------------------|------------------|
| <p>6-(ethylthio)-3-(2-(thiophen-2-yl)ethyl)-1,2,3,4-tetrahydro-1,3,5-triazin-1-ium chloride<br/><b>(30)</b></p> | 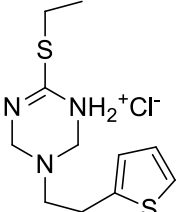   | <p>1.1 ± 1.1</p>  | <p>8.1 ± 1.0</p> | <p>5.5 ± 1.4</p> |
| <p>6-(ethylthio)-3-isobutyl-1,2,3,4-tetrahydro-1,3,5-triazin-1-ium chloride<br/><b>(31)</b></p>                 |    | <p>1.2 ± 0.6</p>  | <p>3.1 ± 0.5</p> | <p>0.3 ± 0.3</p> |
| <p>6-(ethylthio)-3-neopentyl-1,2,3,4-tetrahydro-1,3,5-triazin-1-ium chloride<br/><b>(32)</b></p>                |    | <p>4.7 ± 1.3</p>  | <p>2.9 ± 0.4</p> | <p>0.6 ± 0.6</p> |
| <p>3-(cyclohexylmethyl)-6-(ethylthio)-1,2,3,4-tetrahydro-1,3,5-triazin-1-ium chloride<br/><b>(33)</b></p>       |   | <p>63.9 ± 2.0</p> | <p>6.4 ± 0.8</p> | <p>0</p>         |
| <p>3-cyclooctyl-6-(ethylthio)-1,2,3,4-tetrahydro-1,3,5-triazin-1-ium chloride<br/><b>(34)</b></p>               |  | <p>89.7 ± 0.4</p> | <p>7.4 ± 0.9</p> | <p>2.7 ± 1.1</p> |
